# Supplementary material for: Effects of Lumbosacral Spinal Cord Epidural Stimulation for Standing after Chronic Complete Paralysis in Humans
Source: PubMed Central journal article supplement (PMC4514797; doi:10.1371/journal.pone.0133998), 2015-07-24
Supplement: pone.0133998.s004.pdf [file pone.0133998.s004.pdf]

**Table S1. Variability of the spinal cord evoked responses during standing at different stimulation frequencies.**

For all research participants, coefficient of variation was calculated from spinal cord evoked responses (N = 20) selected within a representative portion of continuous (not rhythmic) EMG, recorded during assisted standing with the following stimulation frequencies: 2 Hz, 10 Hz, 20 Hz and 30 Hz. Stimulation amplitude and electrode configuration (cathodes in black, anodes in grey, and non-active in white) are reported below. MH: medial hamstring; VL: vastus lateralis; TA: tibialis anterior; SOL: soleus.

| Stimulation frequency (Hz) | B07  |      |      |      | A45  |      |      |      | B13  |      |      |      | A53  |      |      |      |
|----------------------------|------|------|------|------|------|------|------|------|------|------|------|------|------|------|------|------|
|                            | MH   | VL   | TA   | SOL  | MH   | VL   | TA   | SOL  | MH   | VL   | TA   | SOL  | MH   | VL   | TA   | SOL  |
| 2                          | 0.18 | 0.18 | 0.19 | 0.23 | 0.22 | 0.37 | 0.30 | 0.18 | 0.22 | 0.24 | 0.33 | 0.31 | 0.15 | 0.22 | 0.37 | 0.25 |
| 10                         | 0.20 | 0.44 | 0.17 | 0.16 | 0.10 | 0.39 | 0.37 | 0.31 | 0.28 | 0.30 | 0.25 | 0.43 | 0.07 | 0.41 | 0.22 | 0.19 |
| 20                         | 0.61 | 0.61 | 0.37 | 0.43 | 0.23 | 0.49 | 0.58 | 0.61 | 0.37 | 0.59 | 0.60 | 0.45 | 0.33 | 0.58 | 0.46 | 0.59 |
| 30                         | 0.75 | 0.69 | 0.67 | 0.84 | 0.50 | 0.57 | 0.70 | 0.59 | 0.42 | 0.68 | 0.59 | 0.49 | 0.37 | 0.84 | 0.58 | 0.67 |

3.0 V

|   |    |     |
|---|----|-----|
|   | 5* | 11* |
|   | 6  |     |
| 1 | 12 |     |
| 2 | 13 |     |
|   | 8  |     |
| 3 | 9  | 14  |
| 4 | 10 | 15  |
